# Supplementary material
Source: publisher figshare collection journal article supplement (https://gsajournals.figshare.com/ndownloader/files/20183222)
Supplement: Supplementary file 1 [file 20183222]

## Sheet: Sheet2
LG3		location (bp)	raw lod	residual lod			LG8		location (bp)	raw lod	residual lod
L1207_81	3	5647771	0.465432	0.912642			L11610_109	8	15458300	1.05085	0.996147
L1209_115	3	5649237	4.02989	3.30733			L11615_109	8	15505656	3.29392	1.67162
L1209_16	3	5649336	3.62179	2.31843			L11616_9	8	15507534	0.779168	0.774967
L1217_70	3	5705847	1.1562	0.461696
							L11618_58	8	15517596	2.34879	0.584118
L1388_139	3	7331526	1.83996	1.22384			L11621_90	8	15520314	3.41057	1.72094
L1388_109	3	7331556	4.48446	4.91187			L11622_91	8	15531444	3.41057	1.72094
L1388_73	3	7331592	1.27195	0.905998			L11629_90	8	15596603	3.34179	1.60229
L1406_13	3	7504663	2.92587	4.13348			L11629_89	8	15596604	3.34179	1.60229
L1408_17	3	7510840	0.962299	1.13499			L11628_28	8	15596718	0.768632	1.00189
L1436_133	3	7812927	1.65239	2.63541			L11691_109	8	16137947	0.750781	0.766689
L1441_30	3	7876364	3.16834	4.25709			L11693_71	8	16206807	3.25093	1.75023
L1441_23	3	7876371	3.16834	4.25709			L11693_77	8	16206813	0.727622	0.619825
L1442_51	3	7882395	0.683988	0.51646
							L11762_100	8	16814885	0.921075	1.03811
L1554_110	3	8817694	1.90327	0.986017			L11765_27	8	16871118	3.18549	2.252
L1553_10	3	8817811	3.59886	3.26599			L11764_71	8	16871213	1.07252	1.21274
L1553_53	3	8817854	3.59886	3.26599
L1553_55	3	8817856	3.59886	3.26599			L11764_95	8	16871237	1.07252	1.21274
L1553_58	3	8817859	3.59886	3.26599			L11764_104	8	16871246	3.26795	1.52669
L1555_83	3	8819613	3.59886	3.26599			L11772_85	8	16935117	3.26795	1.52669
L1558_101	3	8831892	1.48015	0.783531			L11772_98	8	16935130	3.26795	1.52669
L1558_24	3	8831969	3.33622	3.07996			L11776_113	8	16963077	0.907536	0.261394
L1565_108	3	8859952	2.10748	1.36379			L11785_23	8	17014499	3.44256	1.98558
							L11785_24	8	17014500	3.44256	1.98558
L1581_7	3	8944492	1.51242	0.906075			L11790_61	8	17064456	1.00747	1.52927
L1588_64	3	8971145	3.15013	2.87741
L1591_54	3	8997056	2.72865	1.16394			L11814_120	8	17229171	0.763763	1.13016
							L11818_120	8	17255687	3.40857	2.35641
L1622_112	3	9186369	2.43465	1.08493			L11818_58	8	17255749	1.82399	1.04142
L1622_90	3	9186391	3.20241	2.76961
L1621_92	3	9186570	3.20241	2.76961			L11834_7	8	17371501	1.02119	1.46941
L1623_92	3	9231202	2.86806	2.15343			L11836_126	8	17378167	3.3611	2.51581
L1627_91	3	9266284	3.7141	2.8649			L11836_114	8	17378179	3.3611	2.51581
L1627_42	3	9266333	3.90654	2.40985			L11837_105	8	17380096	0.675251	0.930672
L1630_62	3	9275833	1.41168	1.45344
							L11875_19	8	17555537	1.47958	1.63273
L1643_96	3	9339115	1.61906	1.67212			L11881_30	8	17581467	3.92708	3.31852
L1642_16	3	9339224	3.33692	2.62697			L11886_134	8	17590684	0.972171	1.30149
L1642_24	3	9339232	1.72086	1.61938
							L11924_119	8	17810991	1.42927	0.728457
L1648_108	3	9398202	2.79425	1.18172			L11930_67	8	17842407	4.01301	3.16736
L1648_73	3	9398237	3.10346	1.69343			L11933_119	8	17862872	1.04417	1.73052
L1647_55	3	9398362	1.35664	0.731855			L11933_74	8	17862917	3.01785	2.18039
L1654_126	3	9435645	3.61684	3.84562			L11932_73	8	17863061	0.449258	1.25764
L1654_17	3	9435754	3.61684	3.84562
L1653_37	3	9435805	3.60401	3.82778			L11957_118	8	18001057	1.47364	0.582977
L1653_119	3	9435887	3.60401	3.82778			L11959_80	8	18005714	3.32719	2.88148
L1657_41	3	9443063	3.60401	3.82778			L11959_70	8	18005724	3.32719	2.88148
L1663_14	3	9500283	1.1935	0.72071			L11958_109	8	18005900	3.32719	2.88148
							L11958_112	8	18005903	0.656934	1.46242
L1685_126	3	9621406	1.1935	0.72071
L1689_103	3	9687256	3.42708	3.54514			L11981_101	8	18121095	2.89114	1.92809
L1689_104	3	9687257	3.42708	3.54514			L11984_107	8	18142679	3.27119	2.40734
L1689_129	3	9687282	3.42708	3.54514			L11984_7	8	18142779	1.29626	0.393979
L1695_122	3	9733119	1.86154	1.24034
							L11986_71	8	18157351	1.41175	0.363473
L1699_22	3	9770835	2.654	2.98202			L11988_18	8	18228931	3.44596	2.83329
L1712_118	3	9803903	3.01316	1.7974			L11987_20	8	18228966	0.826143	1.47576
L1712_117	3	9803904	3.01316	1.7974			L11987_69	8	18229015	4.3114	3.44595
L1720_35	3	9867476	2.76854	1.54704			L11987_127	8	18229073	4.3114	3.44595
							L11993_28	8	18268403	4.3114	3.44595
							L11995_126	8	18283844	0.455557	0.482116
L4_137	3	10037437	1.90455	1.27547
L4_34	3	10037540	3.88206	2.31054			L12004_45	8	18298124	0.766116	1.4374
L10_35	3	10063474	3.44318	1.87566			L12003_10	8	18298176	3.65107	3.00143
L16_73	3	10116883	3.46981	3.73717			L12011_111	8	18320373	1.39753	2.2002
L21_137	3	10195393	2.14936	1.24516
							L12022_120	8	18389437	0.803547	1.7112
							L12022_75	8	18389482	3.62036	3.04762
							L12021_30	8	18389584	0.835309	1.44333
							L12044_63	8	18497862	0.645537	1.55305
							L12044_125	8	18497924	3.09264	3.14029
							L12047_88	8	18499497	0.865442	1.86144
							L12046_77	8	18499659	0.817999	0.298881
							L12046_138	8	18499720	3.2821	2.68561
							L12052_56	8	18615956	0.745126	1.55795
							L12082_117	8	18853038	0.946824	0.145972
							L12082_96	8	18853059	3.39181	3.09112
							L12086_6	8	18882332	0.51709	1.23949
Key:
Raw LOD > 3
Raw LOD > 3; Resi LOD < 3
Raw LOD < 3; Resi LOD > 4
